# Supplementary material for: Application of the HIDRA2 deep-learning model for sea level forecasting along the Estonian coast of the Baltic Sea
Source: Copernicus journal article supplement (doi:10.5194/os-21-1315-2025), 2025-07-14
Supplement: Supplementary file 1 [file os-21-1315-2025-supplement.pdf]

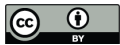

*Supplement of*

## **Application of the HIDRA2 deep-learning model for sea level forecasting along the Estonian coast of the Baltic Sea**

**Amirhossein Barzandeh et al.**

*Correspondence to:* Amirhossein Barzandeh ([amirhossein.barzandeh@taltech.ee](mailto:amirhossein.barzandeh@taltech.ee))

The copyright of individual parts of the supplement might differ from the article licence.

### Supplementary Material – Figure S1

Figure S1 presents the predictions of HIDRA2 with a 24-hour lead time, alongside those of NEMO<sub>BAL</sub>, for the entire study period at each station. For clarity, the performance of NEMO<sub>EST</sub>—which demonstrated the lowest overall accuracy—is not included here (see Table 2 in the main manuscript for further details). Both HIDRA2 and NEMO<sub>BAL</sub> show consistent tracking of the observed SSH patterns, particularly during extreme SSH events throughout the comparison period.

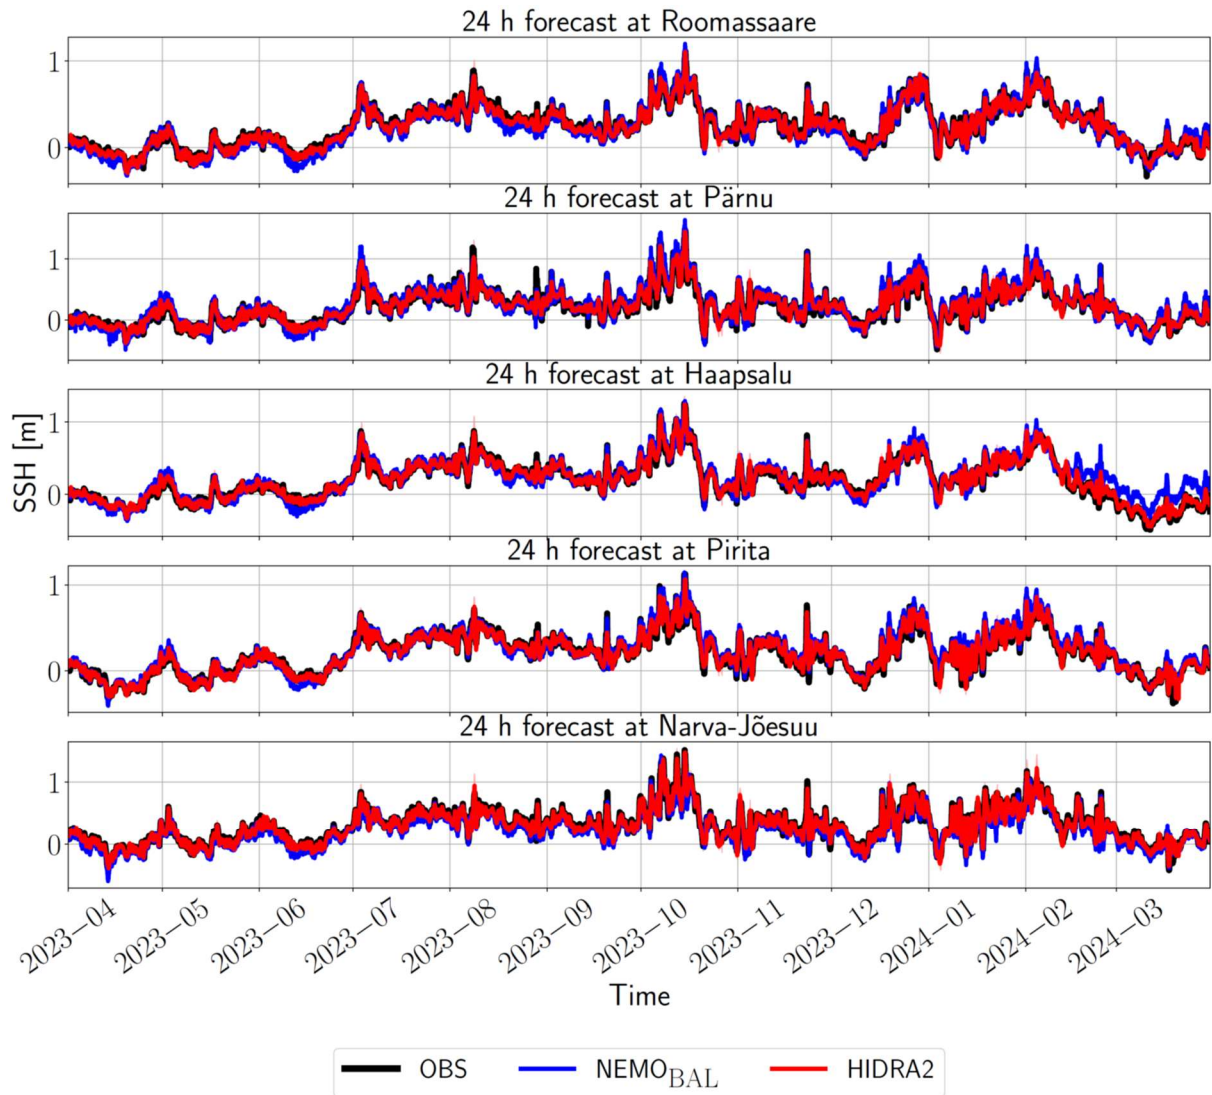

**Figure S1.** Observed SSH (black line) versus NEMO<sub>BAL</sub> (blue line) and HIDRA2 ensemble mean (red line) forecasts with a 24-hour lead time at various stations between April 2023 and April 2024.
